# Supplementary material for: Peach DELLA Protein PpeDGYLA Is Not Degraded in the Presence of Active GA and Causes Dwarfism When Overexpressed in Poplar and Arabidopsis
Source: MDPI journal article supplement (doi:10.3390/ijms24076789), 2023-04-06
Supplement: s1 [file s1]

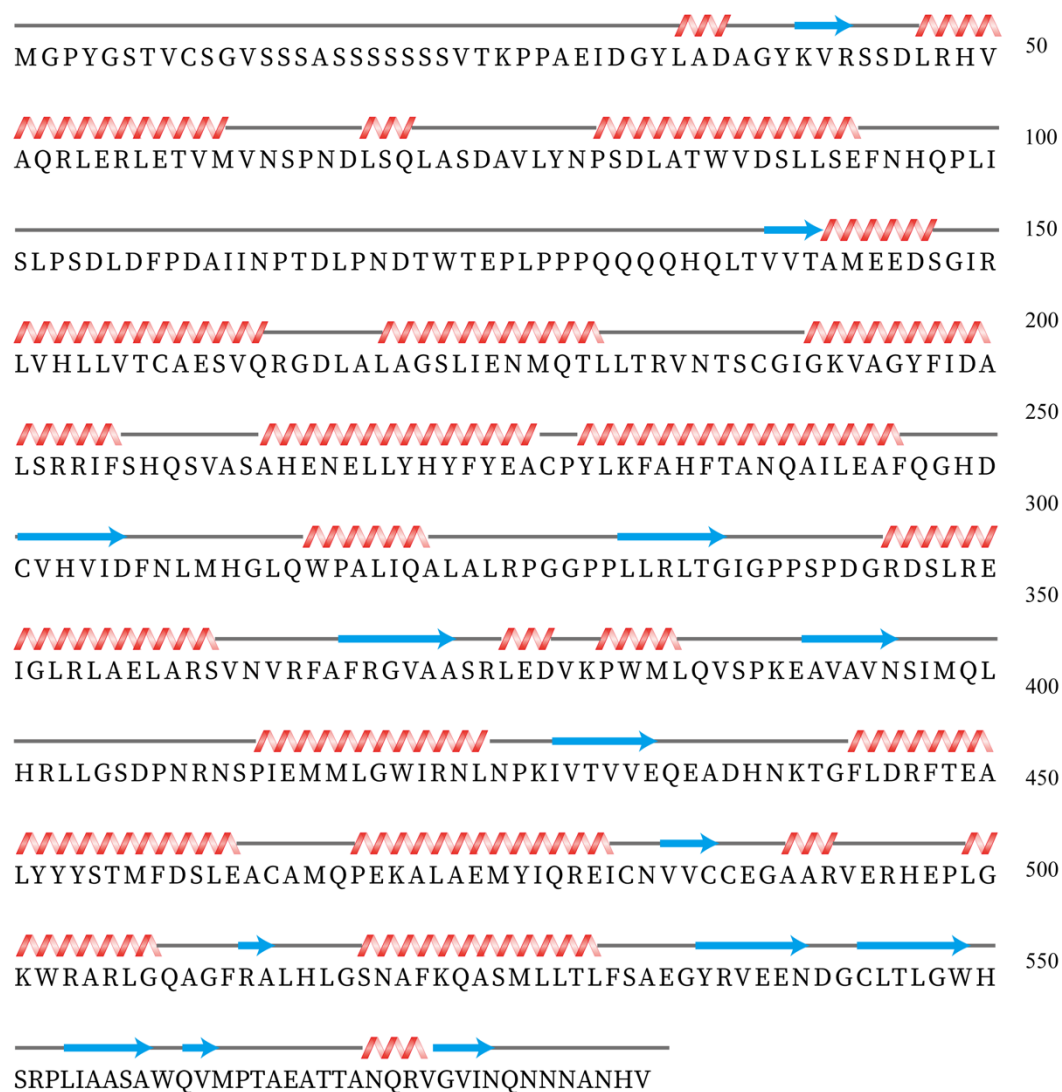

Legend:    → Strand    Helix    — Coil

**Figure S1** Predicted secondary structure of PpeDGYLA. Predictions were made using PSIPRED and GORIV.

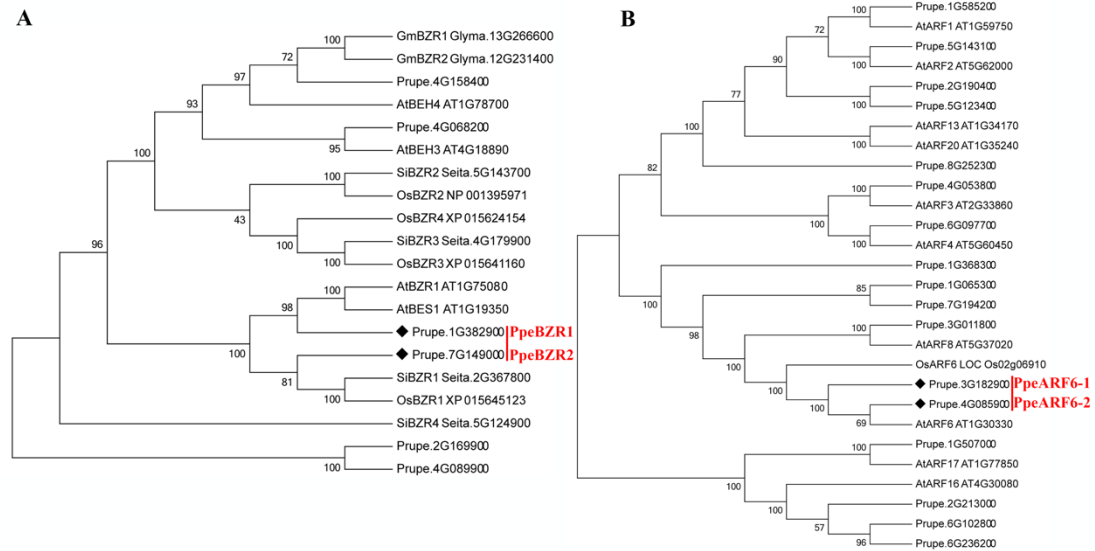

**Figure S2** Phylogenetic tree of *BZR* (A) and *ARF* (B) transcription factor genes in the peach genome and the orthologous genes from other species, including *Glycine max*, *Arabidopsis thaliana*, *Oryza sativa* and *Setaria italica*. Accession numbers are listed after the gene name. The orthologous genes from peach of *BZR* and *ARF* analyzed in this study were in red.

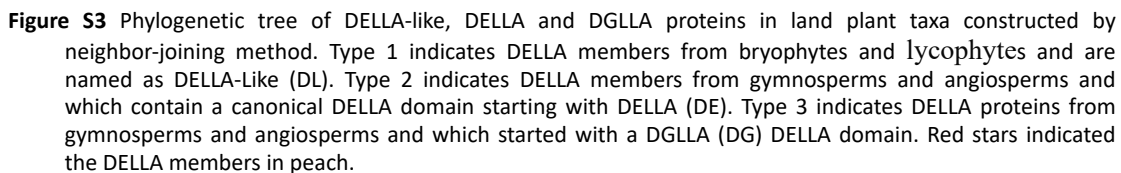

**Figure S3** Phylogenetic tree of DELLA-like, DELLA and DGLLA proteins in land plant taxa constructed by neighbor-joining method. Type 1 indicates DELLA members from bryophytes and lycophytes and are named as DELLA-Like (DL). Type 2 indicates DELLA members from gymnosperms and angiosperms and which contain a canonical DELLA domain starting with DELLA (DE). Type 3 indicates DELLA proteins from gymnosperms and angiosperms and which started with a DGLLA (DG) DELLA domain. Red stars indicated the DELLA members in peach.

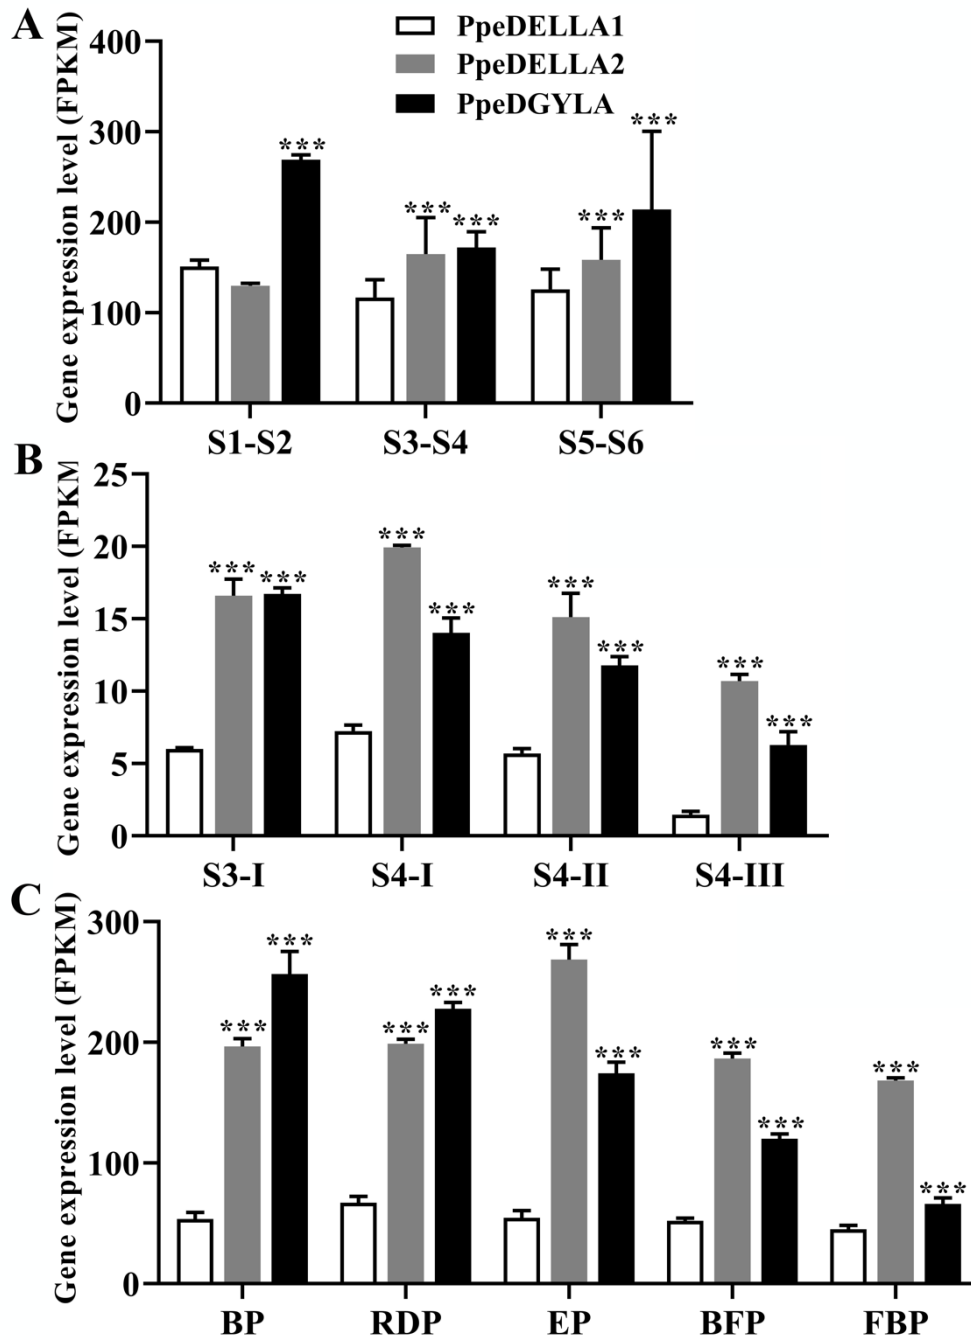

**Figure S4** The transcript levels of the three peach *DELLA* genes based on RNA-seq transcriptome data. (A) In stem internodes, where internodes are numbered S1-S6 from top to bottom of stems, S1-S2, S3-S4 and S5-S6 represent combined samples of the internodes S1 and S2, S3 and S4, and S5 and S6. (B) In fruit, where S3-I, S4-I, S4-II, and S4-III represent 118, 120, 122 and 124 d after full bloom, respectively. (C) In flower, where BP: bud period; RDP: red dot period; EP: equivalent in size between petal and sepal period; BFP: budding flower period; FBP: full bloom period. \*\*\* indicate significant difference at  $P < 0.001$

**Table S1** The primers of PpPIFs for qRT-PCR and vector construction

| Name         | Primer Sequences (5'-3') |
|--------------|--------------------------|
| PpeDELLA1-qF | TGTGGAGCAGGAGGCAAAC      |
| PpeDELLA1-qR | TGACTCGGACCGGACGAT       |
| PpeDELLA2-qF | GCAAACCACAACGGTCCAGT     |

|                           |                                               |
|---------------------------|-----------------------------------------------|
| PpeDELLA2-qR              | GCTCTGACATCGCCTTATCCT                         |
| PpeDGYLA-qF               | TTAGGGCTCTGCATTTGGGTT                         |
| PpeDGYLA-qR               | GGTTGGCTGTGGTTGCTTCA                          |
| PpeDELLA1(pSAK277-Flag)-F | TCCAAAGAATTCCCCGGTACCATGAAGAGAGATCACCGCG      |
| PpeDELLA1(pSAK277-Flag)-R | ATGATCTTTGTAATCCTCGAGCCGGGTTGACTCAGTCGAA      |
| PpeDGYLA(pSAK277-Flag)-F  | TCCAAAGAATTCCCCGGTACCATGGGGCCCTACGGTTCAA      |
| PpeDGYLA(pSAK277-Flag)-R  | ATGATCTTTGTAATCCTCGAGGACATGATTGGCATTATTA      |
| PpePIF8(GAL4AD)-F         | CAGATTACGCTCATATGATGAACCAGTGTGTTCCCAGC        |
| PpePIF8(GAL4AD)-R         | ACGATTCATCTGCAGCTCGAGGCTCTTAGAACTAGATGC       |
| PpeDELLA1(GAL4AD)-F       | CAGATTACGCTCATATGATGAAGAGAGATCACCGCGG         |
| PpeDELLA1(GAL4AD)-R       | CACCCGGGTGGAATTCTCACCGGGTTGACTCAGTCG          |
| PpeDGYLA(GAL4AD)-F        | GTACCAGATTACGCTCATATGATGGGGCCCTACGGTTCA       |
| PpeDGYLA(GAL4AD)-R        | ACGATTCATCTGCAGCTCGAGTTAGACATGATTGGCATTATTATT |
| PpeGID1c(GAL4BD)-F        | TCAGAGGAGGACCTGCATATGATGGCTGGGACCAACGAAGT     |
| PpeGID1c(GAL4BD)-R        | TTATGCGGCCGCTGCAGACCGCACGCGATGAAAGTC          |
| PpeDGYLA(GAL4BD)-F        | TCAGAGGAGGACCTGCATATGATGGGGCCCTACGGTTCA       |
| PpeDGYLA(GAL4BD)-R        | TCGACGGATCCCCGGGAATTCTTAGACATGATTGGCATTATTATT |
| PpeBZR1(GAL4AD)-F         | GGATCCCCGGGAATTCGAGAGGGAAAAGAGAGGGAAGAT       |
| PpeBZR1(GAL4AD)-R         | ATGCCACCCGGGTGGAATTCCTTAACCTTCGAGGCTTACCACTT  |
| PpeBZR2(GAL4AD)-F         | GCCATGGAGGCCAGTGAATTCGCTCAAAGGGTAAGCAGGTGG    |
| PpeBZR2(GAL4AD)-R         | ATGCCACCCGGGTGGAATTCCTGCCCTCCTGGTTATACACATT   |
| PpeARF6-1(GAL4AD)-F       | CAGATTACGCTCATATGATGAGACTTTCGTCTTCATC         |
| PpeARF6-1(GAL4AD)-R       | CATCTGCAGCTCGAGTTAGTAGTCCAGTGAGCC             |
| PpeARF6-2(GAL4AD)-F       | CAGATTACGCTCATATGAGGCTCTCATCTGCTGGTTTTAG      |
| PpeARF6-2(GAL4AD)-R       | TCATCTGCAGCTCGAGGGGTTGGAGGAGATGCAAATAT        |

**Table S2** Physical and chemical properties of the PpeDGYLA

| Characteristics            | Predictive values |
|----------------------------|-------------------|
| Number of amino acids      | 537               |
| Molecular weight           | 59.16 KDa         |
| Theoretical pI             | 5.58              |
| The instability index (II) | 43.68             |
| Aliphatic index            | 90.86             |

|                                            |        |
|--------------------------------------------|--------|
| Grand average of    hydropathicity (GRAVY) | -0.138 |
|--------------------------------------------|--------|

|             |         |
|-------------|---------|
| Alpha helix | 46.00 % |
|-------------|---------|

|                 |         |
|-----------------|---------|
| Extended strand | 12.48 % |
|-----------------|---------|

|             |         |
|-------------|---------|
| Random coil | 41.53 % |
|-------------|---------|

---
